# Supplementary material for: Decreased expression of GEM in osteoarthritis cartilage regulates chondrogenic differentiation via Wnt/β-catenin signaling
Source: PubMed Central journal article supplement (PMC10548561; doi:10.1186/s13018-023-04236-z), 2023-10-04
Supplement: 13018_2023_4236_MOESM1_ESM.pdf [file 13018_2023_4236_MOESM1_ESM.pdf]

Supplementary Figure 1, also see Figure 1

A

Zoning and grading

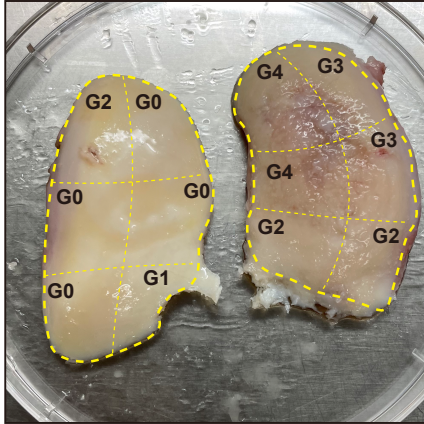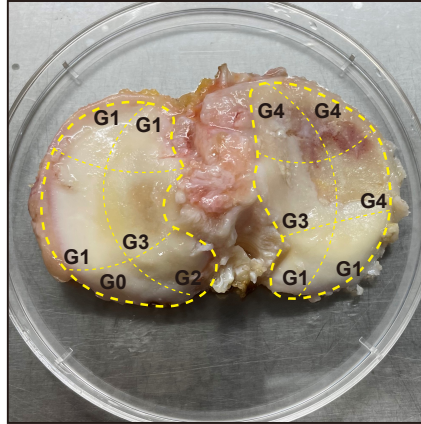

C

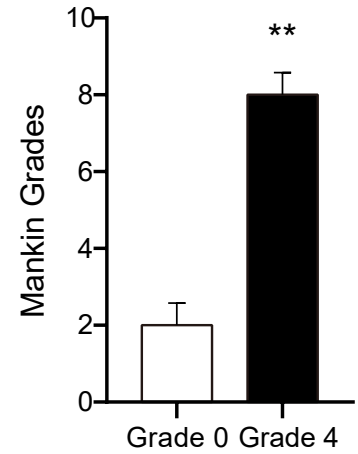

B

Femur

Tibia

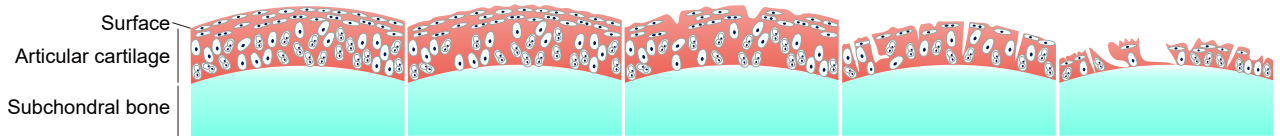

OARSI grading system

Surface intact

Surface uneven

Surface discontinuous

Vertical fissures

Erosion

ICRS grading system

Normal

Abnormal

Abnormal lesions < 50%

Severely abnormal lesions > 50%

Severely abnormal Osteochondral injuries

Grade

Grade 0

Grade 1

Grade 2

Grade 3

Grade 4

D

MMP13

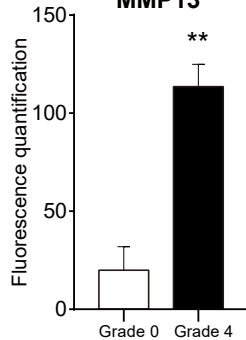

E

GEM

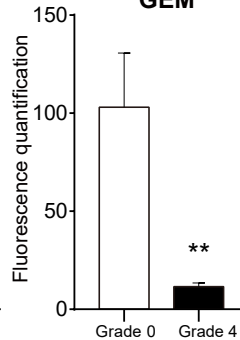

F

RRAD

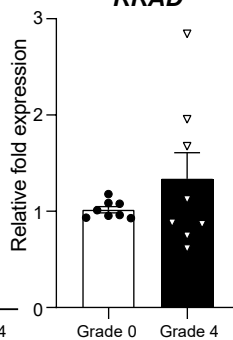

G

REM

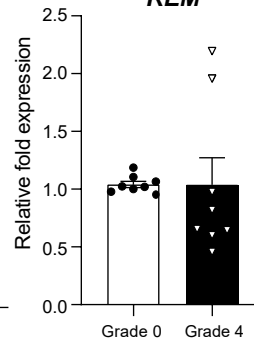

G

Cell viability (%)

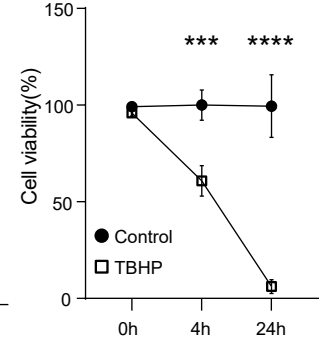

# Supplementary Figure 2, also see Figure 3

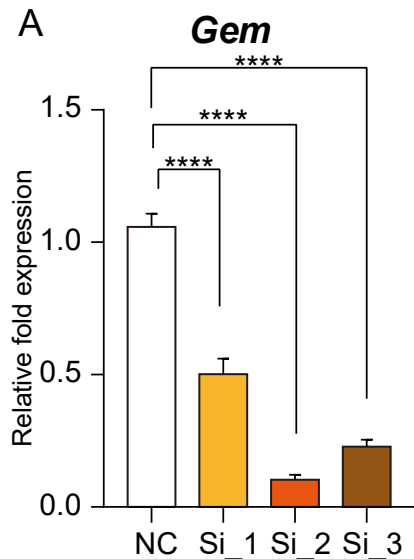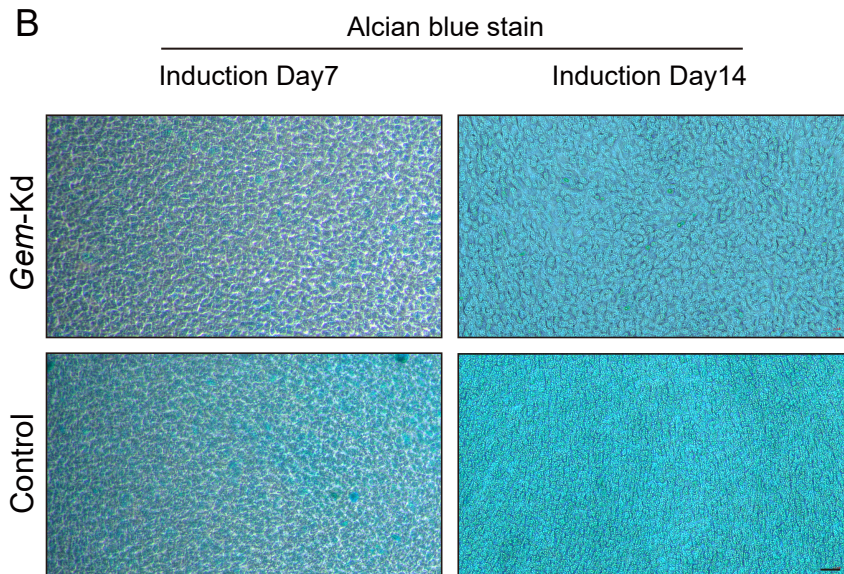

# Supplementary Figure 3, also see Figure 4

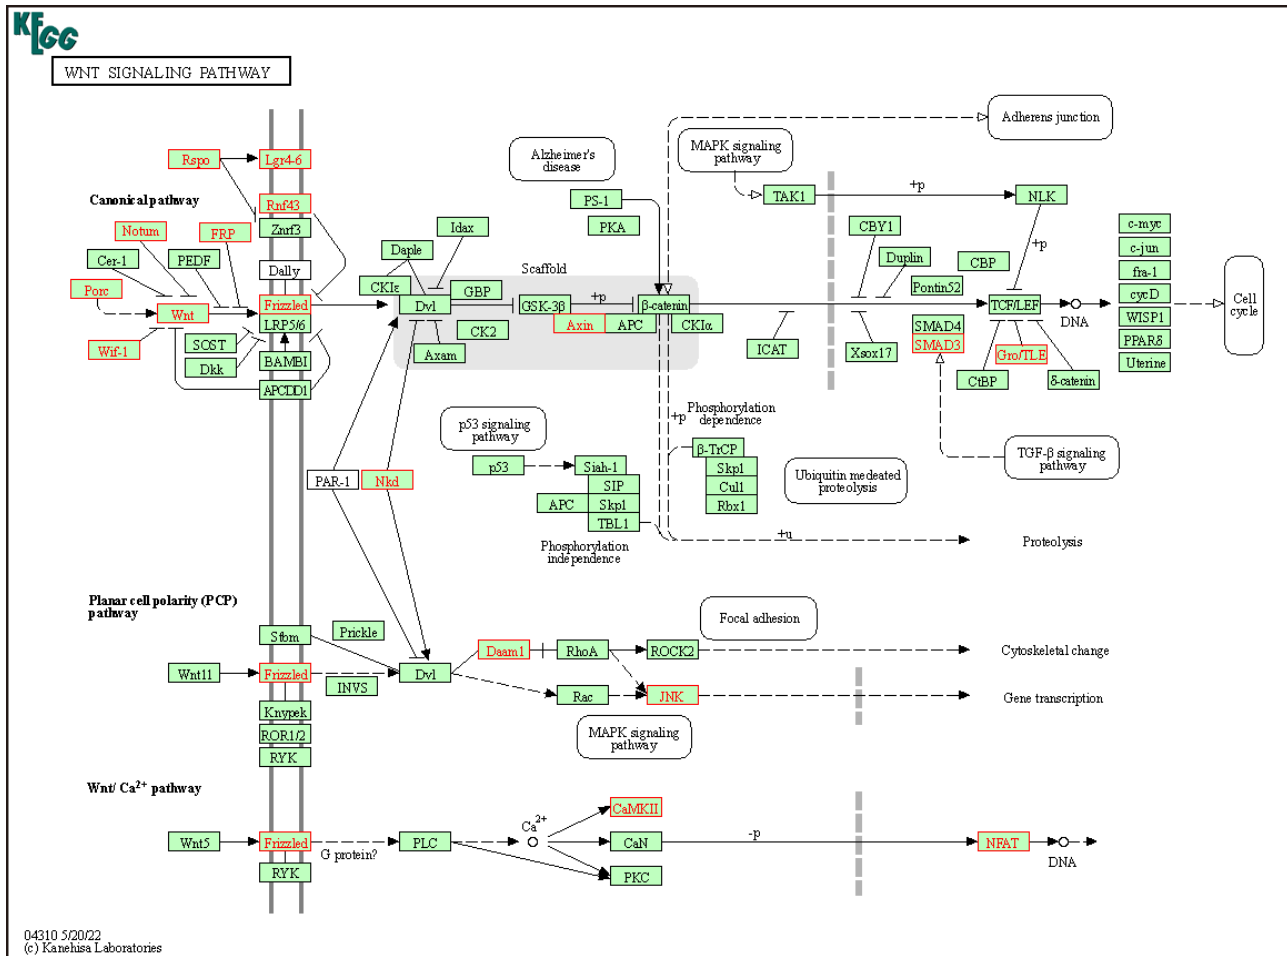

Supplementary Figure 4, also see Figure 5

A

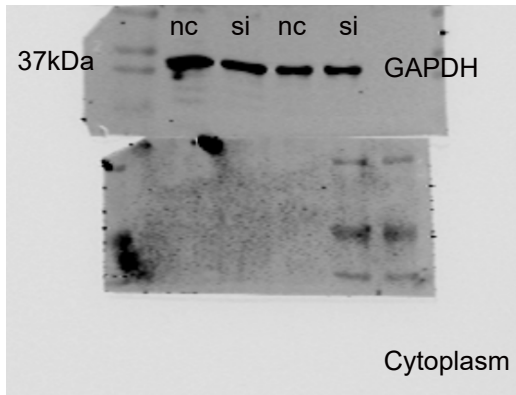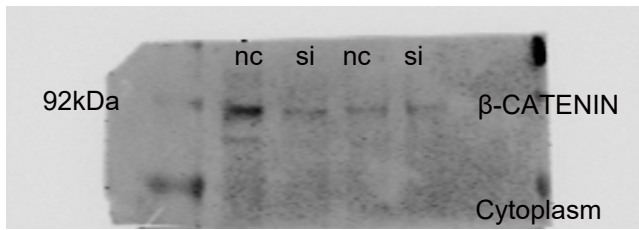

B

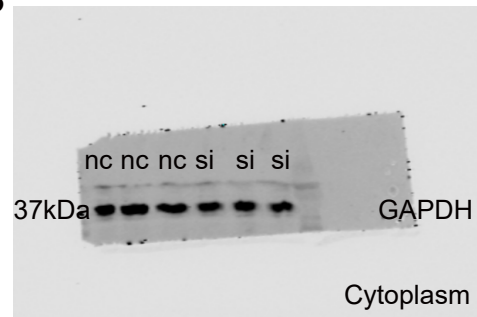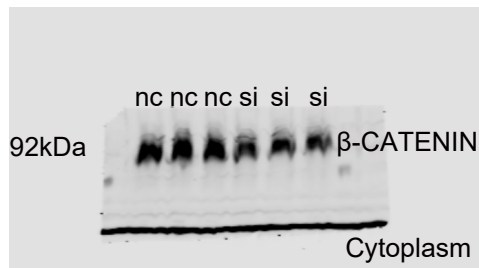

C

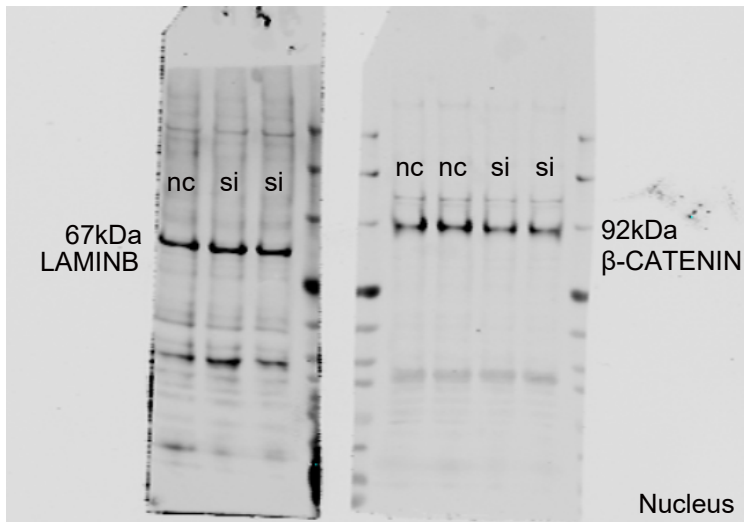

D

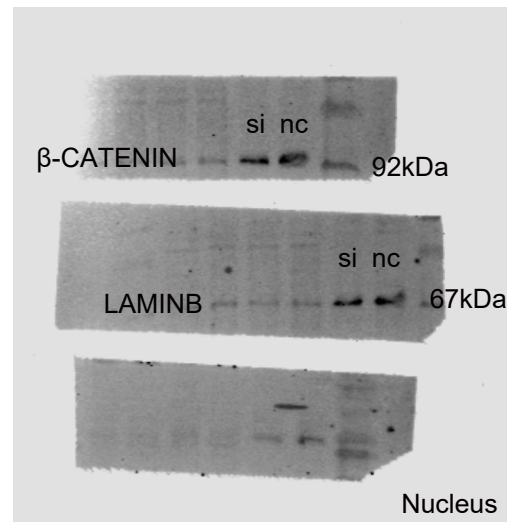

Supplement Table 1

| <b>Primer name</b> | <b>Sequence</b>           |
|--------------------|---------------------------|
| <b>hGEM Fw</b>     | CATGACAGCATGGACAGCGA      |
| <b>hGEM Rv</b>     | GGTTGCACTCTCTCCGTCAA      |
| <b>hSox9 Fw</b>    | AGCGAACGCACATCAAGAC       |
| <b>hSox9 Rv</b>    | CTGTAGGCGATCTGTTGGGG      |
| <b>hCol2a1 Fw</b>  | TGGACGATCAGGCGAAACC       |
| <b>hCol2a1 Rv</b>  | GCTGCGGATGCTCTCAATCT      |
| <b>hACAN Fw</b>    | ACTCTGGGTTTTTCGTGACTCT    |
| <b>hACAN Rv</b>    | ACACTCAGCGAGTTGTCATGG     |
| <b>hREM Fw</b>     | TGCCTTCCACTCAATCCCAG      |
| <b>hREM Rv</b>     | GATCTCCAAGTAGCACCCACAC    |
| <b>mGem Fw</b>     | CATGACAGCATGGACAGCGA      |
| <b>mGem Rv</b>     | GGTTGCACTCTCTCCGTCAA      |
| <b>mSox9 Fw</b>    | ATGAAGATGACCCGACGAGCA     |
| <b>mSox9 Rv</b>    | AACTTGTCTCCTCGCTCTC       |
| <b>mCol2a1 Fw</b>  | GATGACTTTTCTCCGTCTACTGTCC |
| <b>mCol2a1 Rv</b>  | GTATGTGAACCTGCTGTTGCCC    |
| <b>mAcan Fw</b>    | GAGACTTCTGCCTCTGGAATAG    |
| <b>mAcan Rv</b>    | CTCCAGAAGGAATCCCCTAAC     |
| <b>mAxin2 Fw</b>   | AAGGTCCTGGCAACTCAGTA      |
| <b>mAxin2 Rv</b>   | ATGTGAGCCTCCTCTCTTTTAC    |
| <b>mTcf7 Fw</b>    | CCGTATCCACAACAGCTTGC      |
| <b>mTcf7 Rv</b>    | GGCCGCTGATTCTTTCAAGG      |
| <b>mLef1 Fw</b>    | CGGGAAGAGCAGGCCAAATA      |
| <b>mLef1 Rv</b>    | TCTGGGACCTGTACCTGAAGT     |
| <b>mWnt1_Fw</b>    | GGGTTTCTACTACGTTGCTACT    |
| <b>mWnt1_Rv</b>    | CAGACTCTTGAATCCGTCAA      |

| <b>Primer name</b> | <b>Sequence</b>           |
|--------------------|---------------------------|
| mWnt2b_Fw          | GAGTGATCTGTGACAACATCCC    |
| mWnt2b_Rv          | TGACGAGATAGCATAGACGAAC    |
| mWnt4_Fw           | AGTTCAAGCCACATACAGATGA    |
| mWnt4_Rv           | TTTAGATGTCTTGTTGCACGTG    |
| mWnt6_Fw           | CGGTCACTCAAGCCTGTTCCATG   |
| mWnt6_Rv           | GAGGTCCAGGAGTGCCCAGAAG    |
| mWnt7a_Fw          | TGCCTTCACCTATGCGATTATC    |
| mWnt7a_Rv          | CGCCTCGTTATTGTGTAAGTTC    |
| mWnt7b_Fw          | CTCAAGGAGAAGTACAACGCAG    |
| mWnt7b_Rv          | GTCTCCATAGGCTTCTGGTAG     |
| mWnt9b_Fw          | CTCCTGTGCTGTTTCGTACCTGTTG |
| mWnt9b_Rv          | GCCGTGTCATAGCGTAGCTTCAG   |
| mWnt10a_Fw         | AGGTTTTTCGAGAGAGTGCTTTC   |
| mWnt10a_Rv         | AAGCCTTCAGTTTACCCAGAG     |
| mWnt11_Fw          | AATCAGACGCAACACTGTAAAC    |
| mWnt11_Rv          | CTCGATGGAGGAGCAGTTC       |
| mRspo1_Fw          | CATTCTGCTGGAGAGGAACGACATC |
| mRspo1_Rv          | GCCTCACAGTGCTCGATCTTGC    |
| mLgr5_Fw           | TTTTTCTGTCAAGTGCTCTTCG    |
| mLgr5_Rv           | CAGGACACATAGCAAAACGATC    |
| mCcnd1_Fw          | CGTATCTTACTTCAAGTGCGTG    |
| mCcnd1_Rv          | ATGGTCTCCTTCATCTTAGAGG    |
| mLyz2_Fw           | AGGTCTATGAACGTTGTGAGTT    |
| mLyz2_Rv           | ACCAGTATCGGCTATTGATCTG    |

Supplement Table 2

| <b>sample</b>      | <b>concentration (ng/uL)</b> | <b>A260/A280</b> | <b>A260/A230</b> |
|--------------------|------------------------------|------------------|------------------|
| C28/I2-0h-1        | 176.2                        | 1.86             | 2.34             |
| C28/I2-0h-2        | 159.9                        | 1.88             | 2.32             |
| C28/I2-0h-3        | 168.2                        | 1.78             | 2.34             |
| C28/I2-TBHP-4h-1   | 185.5                        | 1.89             | 2.37             |
| C28/I2-TBHP-4h-2   | 162.2                        | 1.91             | 2.06             |
| C28/I2-TBHP-4h-3   | 171.2                        | 1.95             | 1.94             |
| C28/I2-TBHP-24h-1  | 158.4                        | 1.84             | 2.35             |
| C28/I2-TBHP-24h-2  | 169.8                        | 1.9              | 1.98             |
| C28/I2-TBHP-24h-3  | 160.6                        | 1.9              | 1.91             |
| ATDC5-0h-1         | 192.5                        | 2.04             | 2.07             |
| ATDC5-0h-2         | 199.7                        | 1.86             | 2.19             |
| ATDC5-0h-3         | 189.8                        | 1.91             | 2.18             |
| ATDC5-TBHP-4h-1    | 166.5                        | 1.94             | 2.1              |
| ATDC5-TBHP-4h-2    | 156.2                        | 1.96             | 2.26             |
| ATDC5-TBHP-4h-3    | 149.8                        | 1.9              | 2.01             |
| ATDC5-TBHP-24h-1   | 159.6                        | 1.89             | 2.34             |
| ATDC5-TBHP-24h-2   | 156.2                        | 1.9              | 2.32             |
| ATDC5-TBHP-24h-3   | 156.6                        | 1.98             | 2.06             |
| Primary-0h-1       | 129.5                        | 2                | 2.3              |
| Primary-0h-2       | 108.6                        | 1.95             | 2.35             |
| Primary-0h-3       | 117.8                        | 1.93             | 2.08             |
| Primary-TBHP-4h-1  | 118.2                        | 1.91             | 2.32             |
| Primary-TBHP-4h-2  | 119.1                        | 1.89             | 2.32             |
| Primary-TBHP-4h-3  | 115.6                        | 1.9              | 2.04             |
| Primary-TBHP-24h-1 | 128.3                        | 1.91             | 2.18             |
| Primary-TBHP-24h-2 | 134.6                        | 1.95             | 2.1              |
| Primary-TBHP-24h-3 | 119.3                        | 1.84             | 2.25             |
